# Supplementary material
Source: publisher figshare collection journal article supplement (https://acs.figshare.com/ndownloader/files/4377700)
Supplement: Supplementary file 1 [file 4377700]

**Table S1.** Initial cleavage sites in human IAPP determined from LP/MS experiments using thermolysin (TH) and human neutrophil elastase (HNE) at a substrate to enzyme ratio of 100:1 in 10 mM sodium phosphate buffer (pH 5.5) at 25 °C.

| Cleavage Site | Enzyme | Fragment | Observed Mass, Da | Calculated Mass, Da | $\Delta$ (Observed Mass - Calculated Mass), Da |
|---------------|--------|----------|-------------------|---------------------|------------------------------------------------|
| Arg11-Leu12   | TH     | 1-11     | 1194.7            | 1194.4              | 0.3                                            |
|               |        | 12-37    | 2726.0            | 2727.0              | -1.0                                           |
| Asn14-Phe15   | TH     | 1-14     | 1429.8            | 1492.7              | 0.1                                            |
|               |        | 15-37    | 2428.4            | 2428.7              | -0.3                                           |
| Phe15-Leu16   | TH     | 1-15     | 1639.9            | 1639.9              | 0                                              |
|               |        | 16-37    | 2280.5            | 2281.5              | -1.0                                           |
| Asn22-Phe23   | TH     | 1-22     | 2392.4            | 2391.7              | 0.7                                            |
|               |        | 23-37    | 1529.9            | 1529.7              | 0.2                                            |
| Val17-His18   | HNE    | 1-17     | 1852.1            | 1852.2              | -0.1                                           |
|               |        | 18-37    | 2068.9            | 2068.9              | 0                                              |
